# Supplementary material for: Metal–organic replica of chiral natural material β-SnF2: an enantiopure binodal (3,5)-connected net based on triangular and trigonal bipyramidal coordination
Source: Royal Society of Chemistry journal article supplement (doi:10.1039/b914582f), 2009-11-19
Supplement: b914582f.pdf [file b914582f.pdf]

## Supporting Information

**Metal-organic replica of chiral natural material  $\beta$ -SnF<sub>2</sub>: an enantiopure binodal (3,5)-connected net based on triangular and trigonal bipyramidal coordination**

**Jie Qin, Chao Qin\*, Xin-Long Wang\*, En-Bo Wang and Zhong-Min Su**

*Key Laboratory of Polyoxometalates Science of Ministry of Education, Department of Chemistry, Northeast Normal University, Changchun, 130024, China.*

**Mineral topologies that have been imitated in MOFs are listed below:**

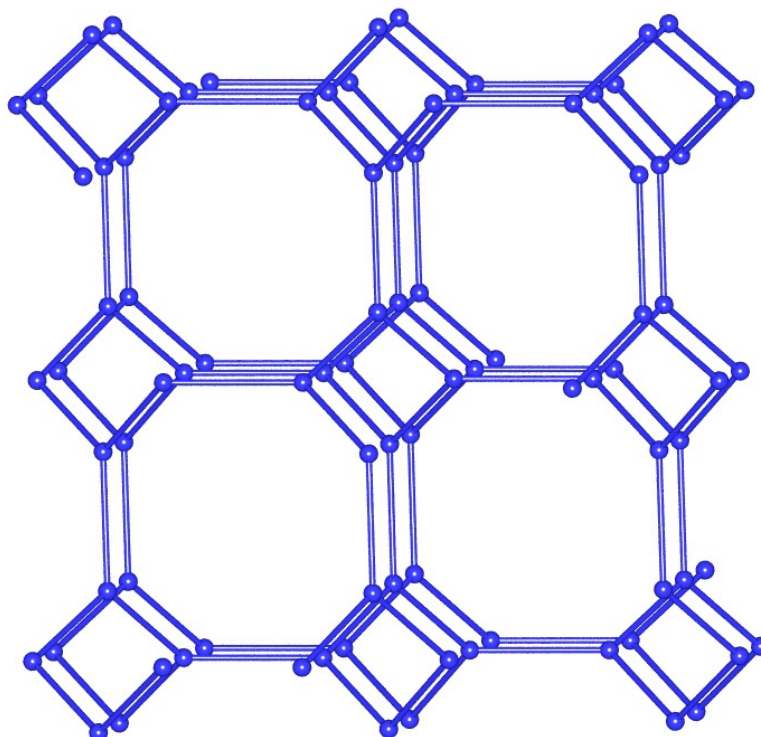

**SrSi<sub>2</sub>**

*J. Am. Chem. Soc.* **1997**, *119*, 2861 – 2868

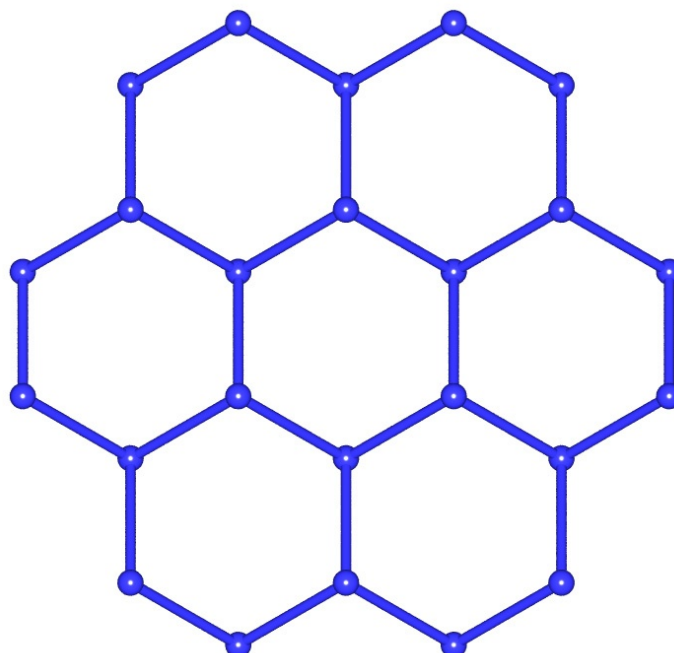

**Perovskite**

*Angew. Chem. Int. Ed.* **2000**, *39*, 2699 – 2701

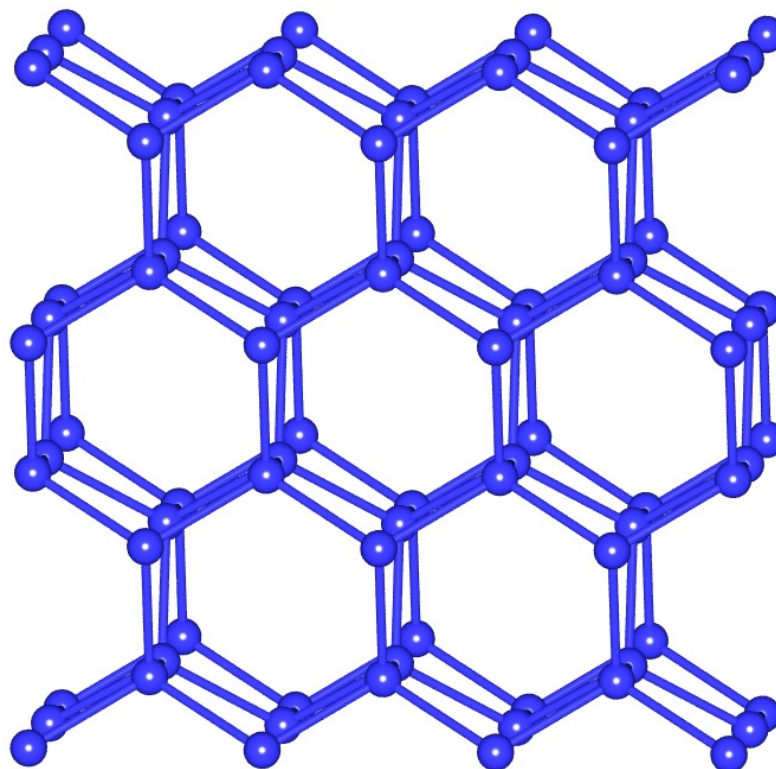

**Diamond**

*Dalton Trans.* 2000, 3735 – 3744

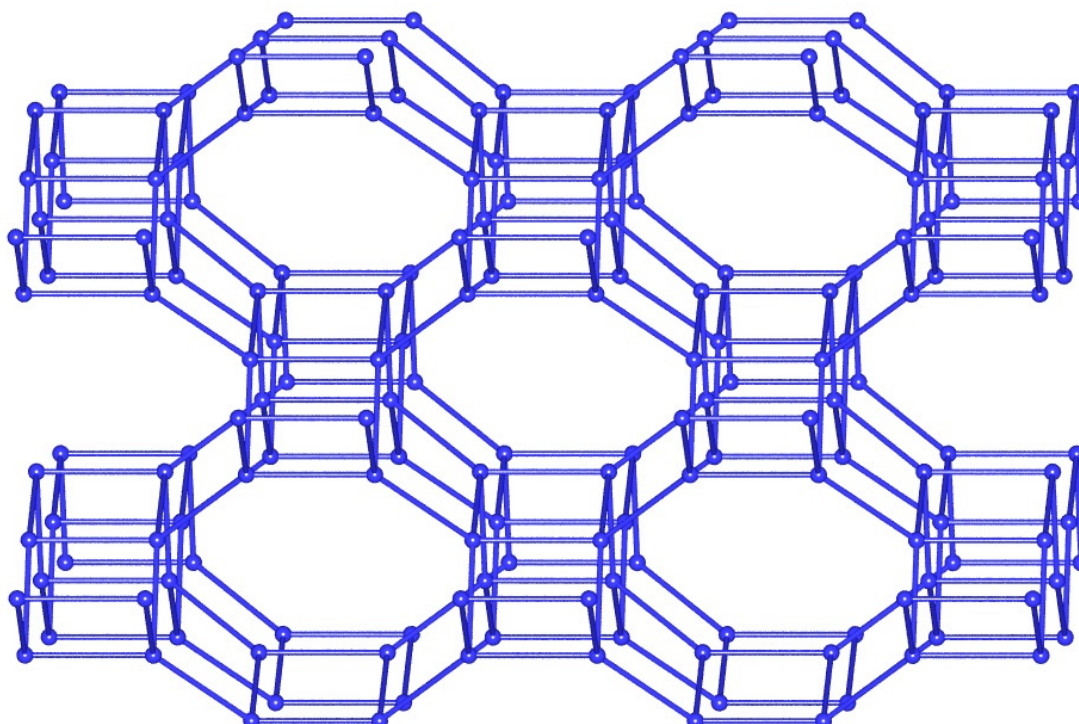

**Feldspar**

*Angew. Chem. Int. Ed.* 1997, 36, 247 – 248

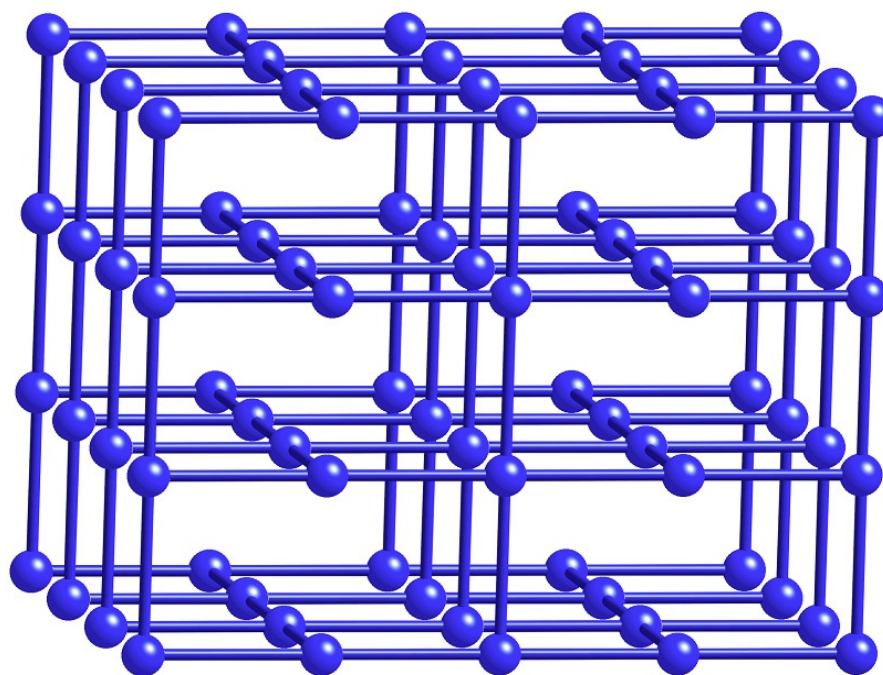

**CdSO<sub>4</sub>**

*Proc. Natl. Acad. Sci. USA* 2002, 99, 4900 – 4904

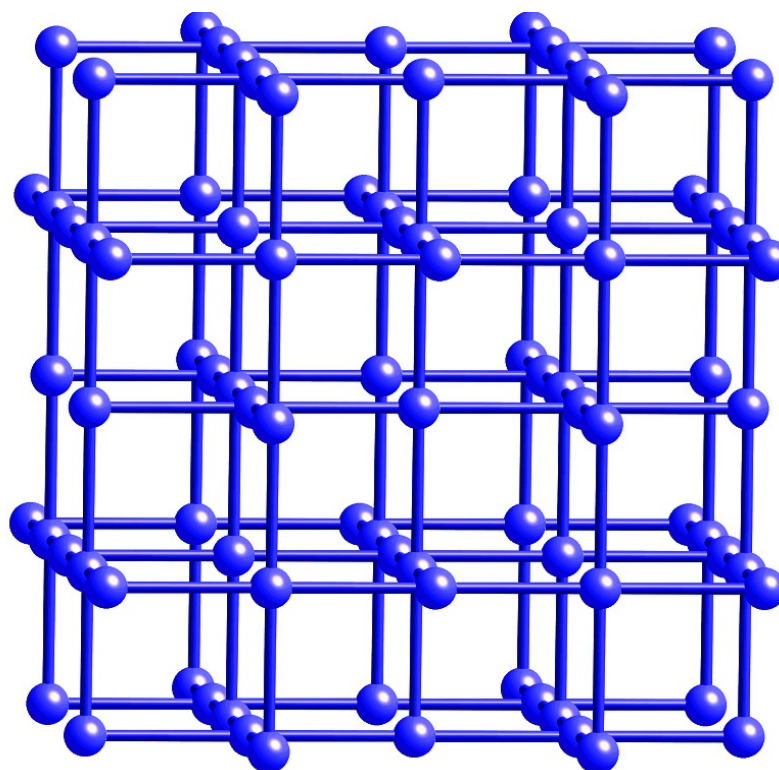

**NbO**

*J. Am. Chem. Soc.* 2002, 124, 376 – 377



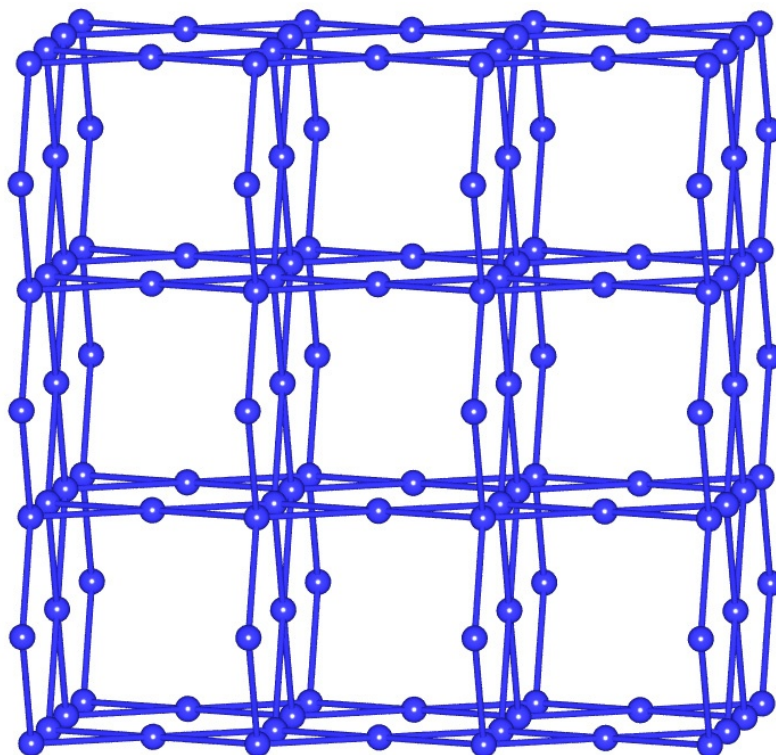

**PtS**

*J. Chem. Soc. Chem. Commun.* 1990, 762 – 763

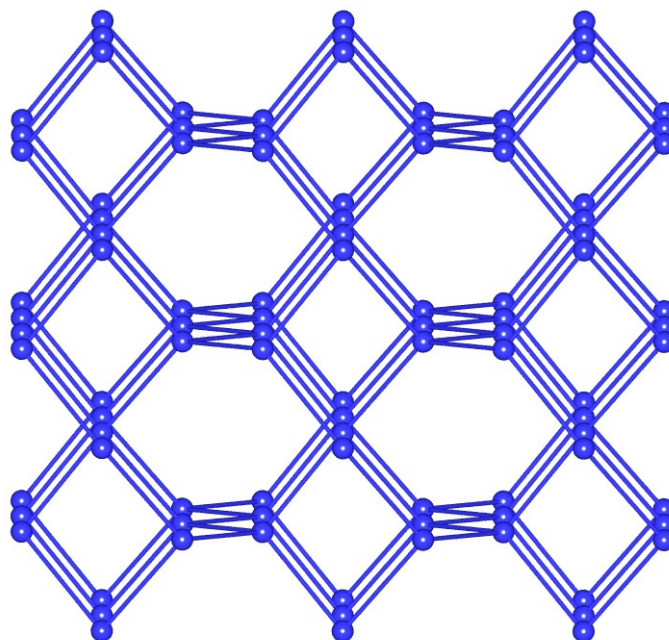

**Quartz**

*Angew. Chem. Int. Ed.* 1995, 34, 1203 – 1204

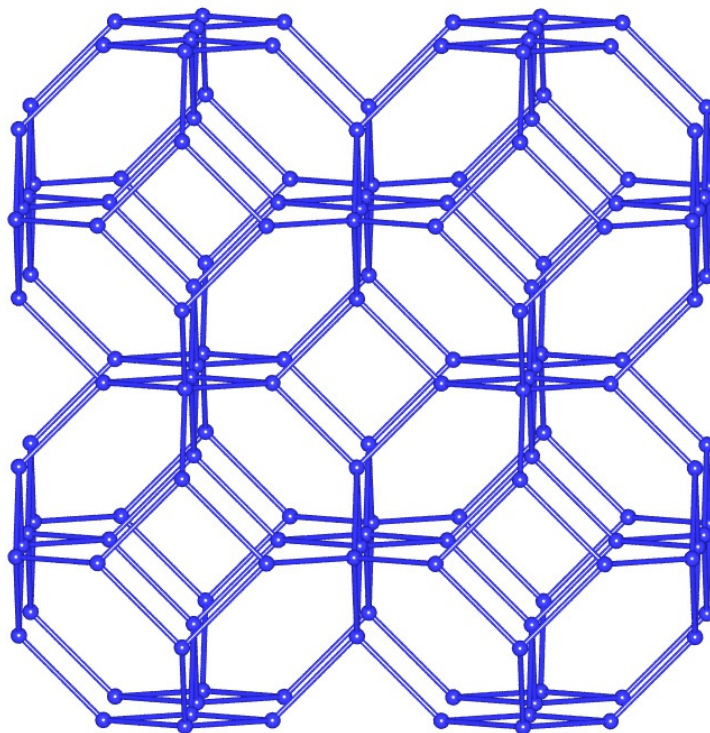

**Sodalite**

*Angew. Chem. Int. Ed.* 2003, 42, 1111 – 1115

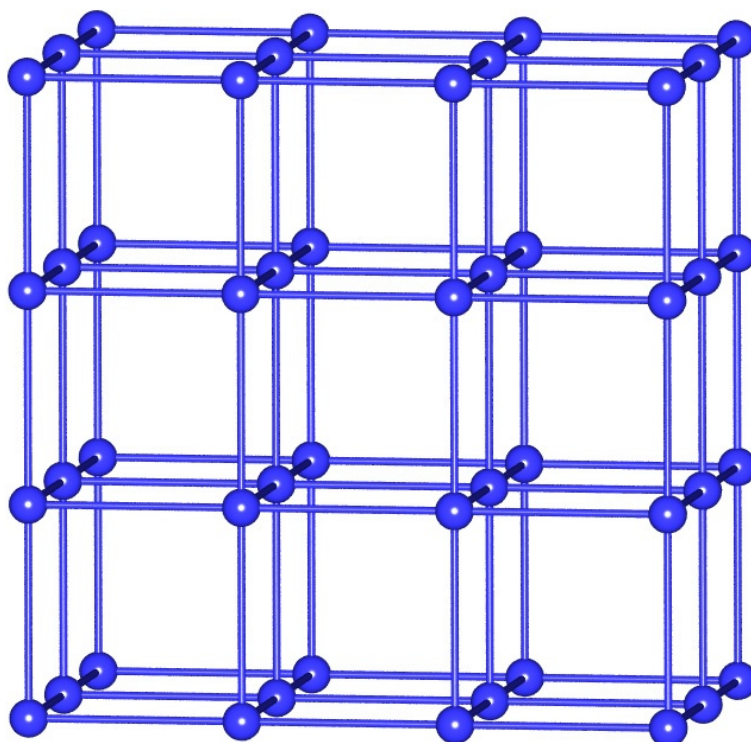

**$\alpha$ -Po**

*Angew. Chem. Int. Ed.* 1997, 36, 2752 – 2755

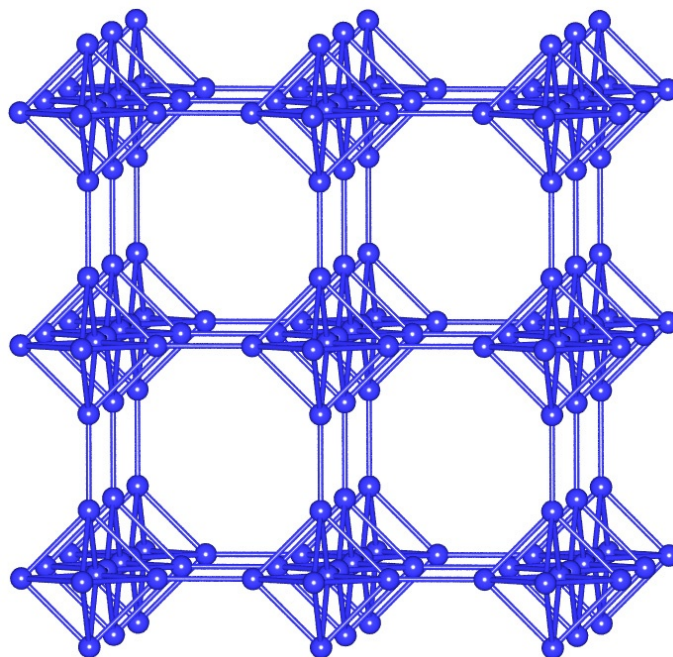

**CaB<sub>6</sub>**

*J. Am. Chem. Soc.* 2001, 123, 8239 – 8247

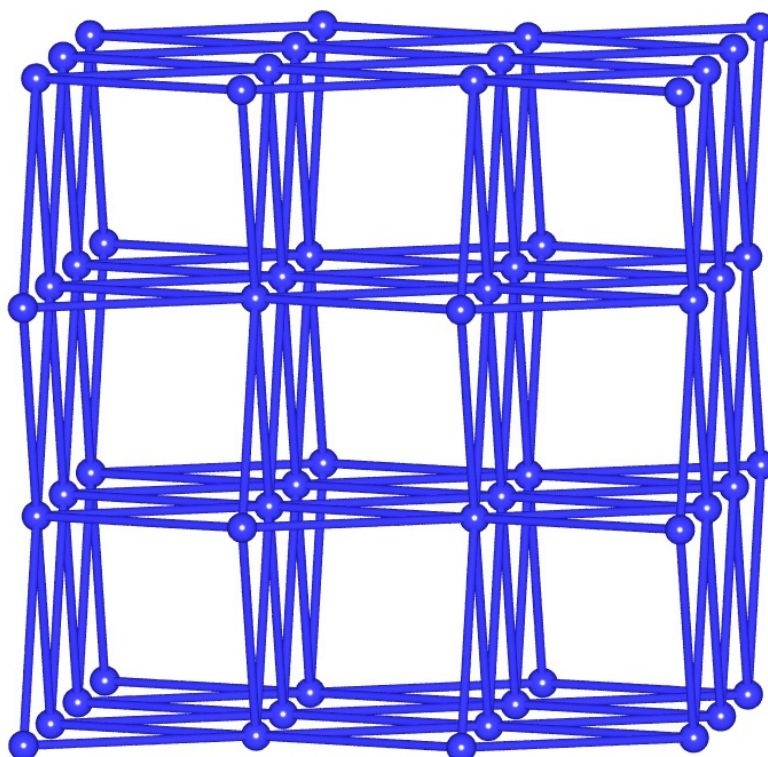

**CsCl**

*Acc. Chem. Res.*, 2005, 38, 176.



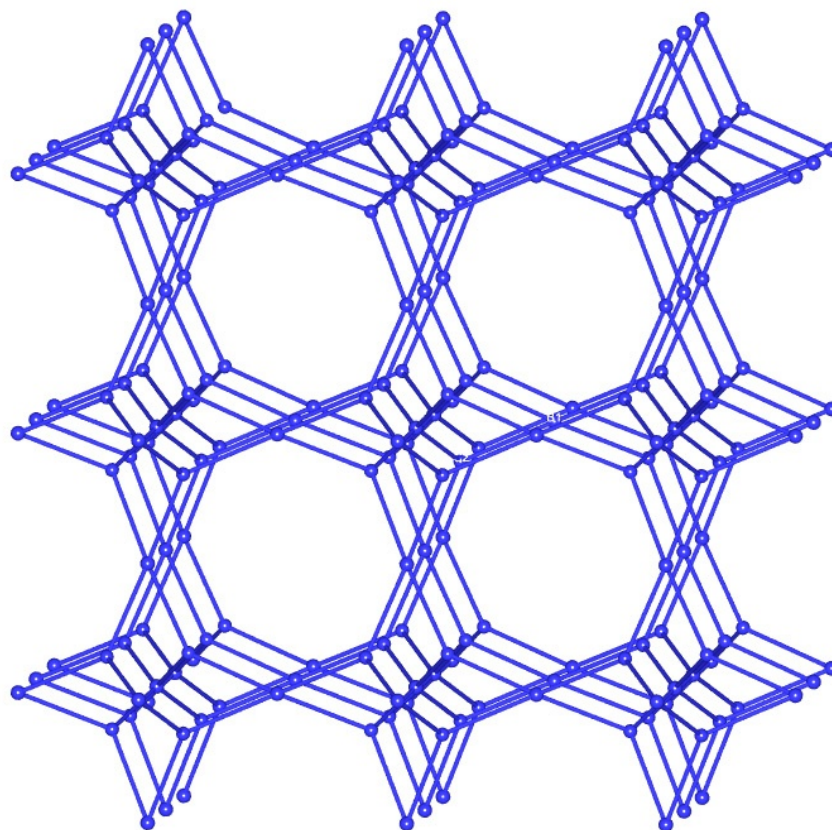

**Brocite**

*Angew. Chem. Int. Ed.* 1996, 35, 1690 – 1692

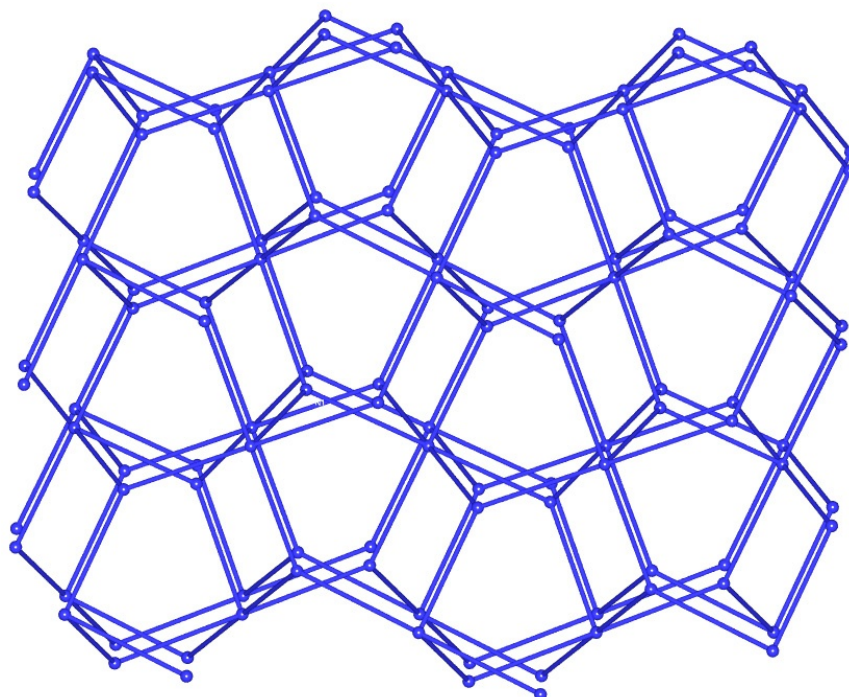

**Pyrite**

*Angew. Chem. Int. Ed.* 2003, 42, 3907 – 3909



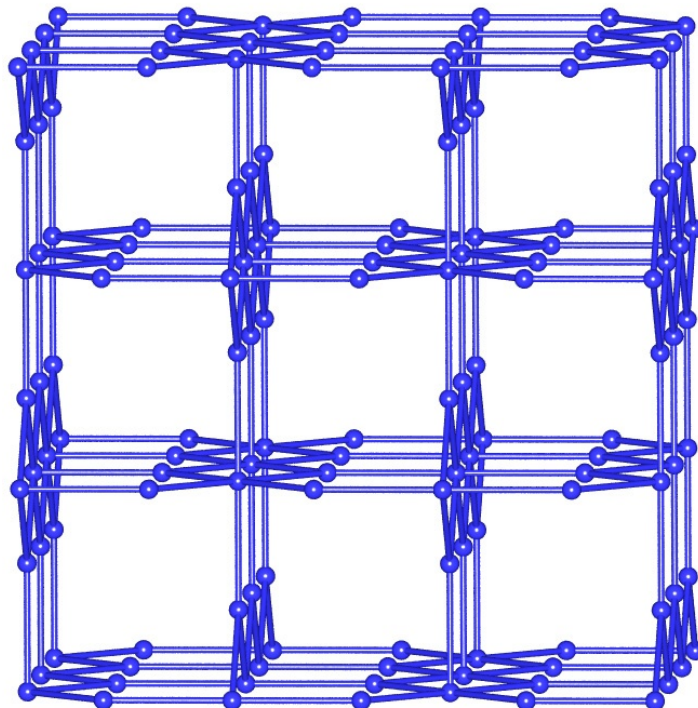

**Rutile**

*J. Chem. Soc. Chem. Commun.* 1991, 445 – 447

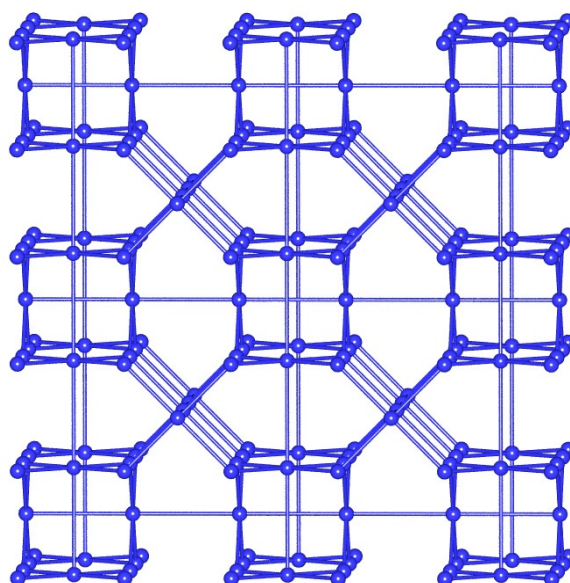

**Pt<sub>3</sub>O<sub>4</sub>**

*Inorg. Chem.* 1995, 34, 757 – 758

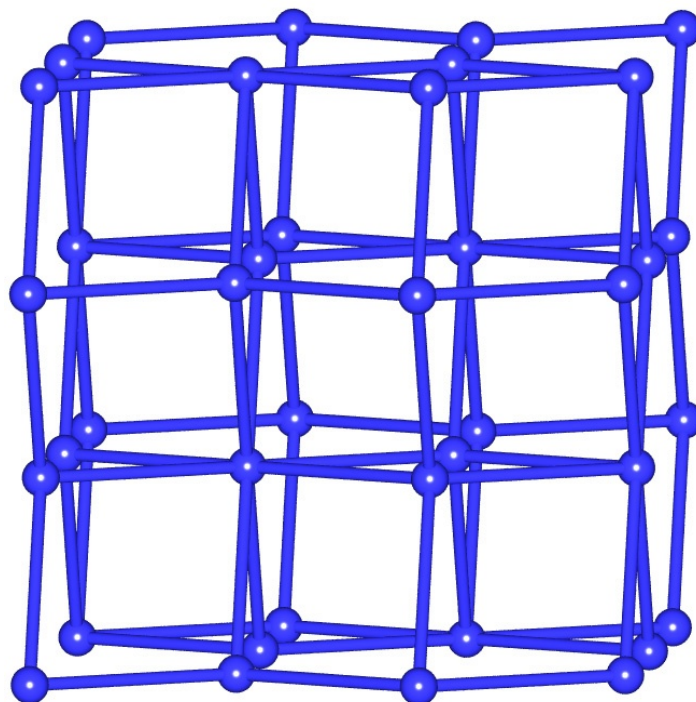

**CaF<sub>2</sub>**

*Angew. Chem. Int. Ed.* 2004, 43, 971 –974

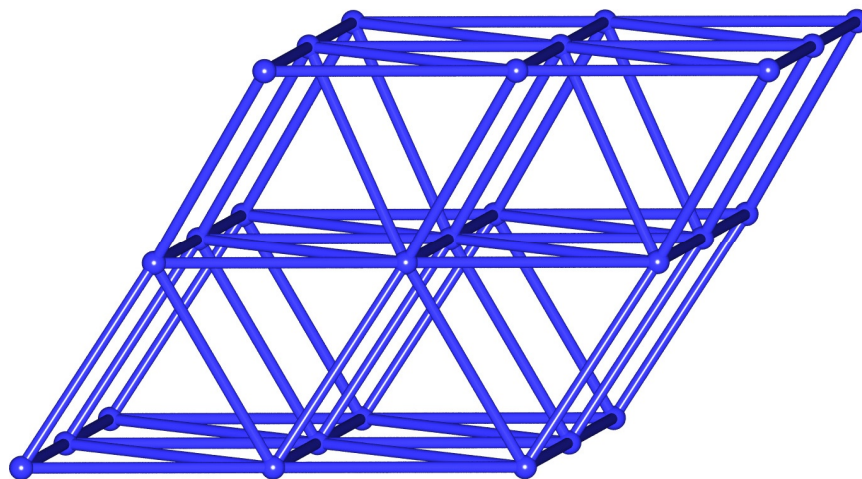

**γ-Pu**

*Chem. Commun.* 2009, 410.

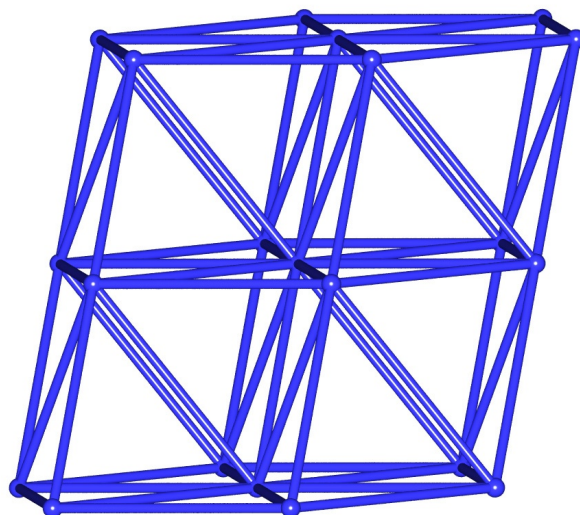

**Fcu**

*J. Am. Chem. Soc.* 2005, 127, 7670-7671  
*Angew. Chem. Int. Ed.* 2005, 44, 4175 -4178

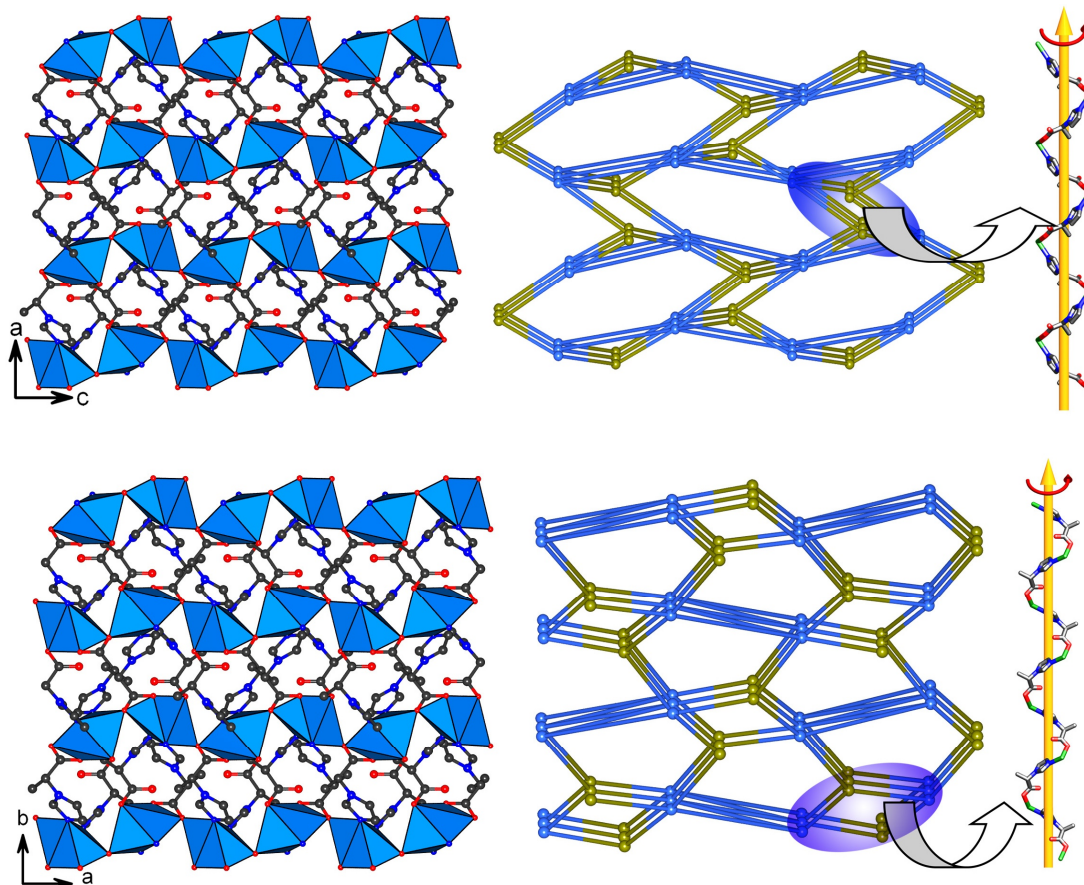

**Fig. S1** Polyhedral and ball-and-stick presentations of the 3D network of **1-L** viewed down the *b* (top) and *c* (bottom) axes.

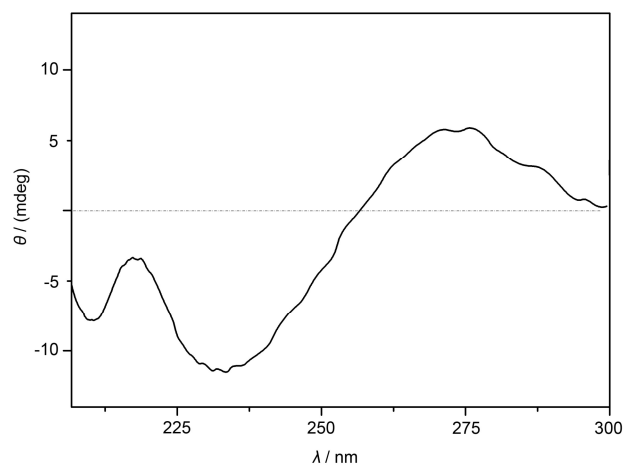

**Fig. S2** Solid-state CD spectrum of **1-L**.

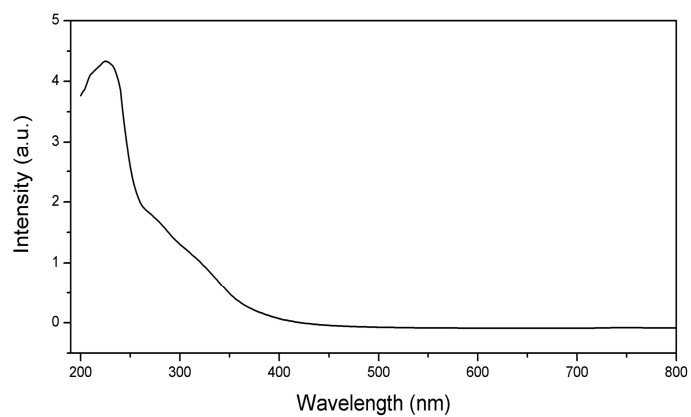

**Fig. S3** UV-vis spectrum of compound **1-L**.
